# Supplementary material for: Evaluation of qPCR-Based Assays for Leprosy Diagnosis Directly in Clinical Specimens
Source: PubMed Central journal article supplement (PMC3191141; doi:10.1371/journal.pntd.0001354), 2011-10-11
Supplement: pntd.0001354.s002.pdf [file pntd.0001354.s002.pdf]

Table S1. Analysis of *M. leprae* DNA detection for different real-time PCR assays in leprosy.

DNA samples from 62 samples of leprosy patients from different clinical forms (treated and untreated),

and also patients from other dermatological conditions and normal skin from healthy donors were tested for 16S, 85B, RLEP, and sodA PCR assays

**Multibacillary patients**

| Biopsy Number | Observations                            | Clinical Form | Ct 16S rRNA | Pred. Class 16S | Ct 85B | Pred. Class 85B | Ct RLEP | Pred. Class RLEP | Ct sodA | Pred. Class sodA |
|---------------|-----------------------------------------|---------------|-------------|-----------------|--------|-----------------|---------|------------------|---------|------------------|
| 1             | RR                                      | BB            | 32,34       | L               | 35,68  | L               | 25,42   | L                | 33,11   | L                |
| 32            |                                         | BB            | 36,87       | L               | 38,95  | L               | 28,11   | L                | NA      | NL               |
| 81            |                                         | BB            | 28,42       | L               | 28,13  | L               | 23,19   | L                | 29,76   | L                |
| 83            | RR                                      | BB            | 32,44       | L               | 31,68  | L               | 26,00   | L                | 33,00   | L                |
| 86            | RR                                      | BB            | 33,77       | L               | 31,31  | L               | 27,81   | L                | 35,53   | L                |
| 2             | Regression/ not detectable bacilli/ ENL | BL            | 35,59       | L               | 39,66  | L               | 29,03   | L                | 35,54   | L                |
| 13            | RR                                      | BL            | 32,33       | L               | 35,18  | L               | 25,47   | L                | 31,88   | L                |
| 33            |                                         | BL            | 29,73       | L               | 33,19  | L               | 23,41   | L                | 35,64   | L                |
| 84            |                                         | BL            | 27,58       | L               | 27,31  | L               | 21,24   | L                | 28,44   | L                |
| 85            | RR                                      | BL            | 25,28       | L               | 24,88  | L               | 19,25   | L                | 27,07   | L                |
| 4             |                                         | LL            | 29,50       | L               | 32,02  | L               | 22,71   | L                | 31,47   | L                |
| 6             |                                         | LL            | 28,57       | L               | 32,21  | L               | 21,80   | L                | 33,80   | L                |
| 9             |                                         | LL            | 27,16       | L               | 28,79  | L               | 20,26   | L                | 26,64   | L                |

|    |  |    |       |   |       |    |       |   |       |   |
|----|--|----|-------|---|-------|----|-------|---|-------|---|
| 15 |  | LL | 28,35 | L | 30,08 | L  | 21,36 | L | 28,24 | L |
| 18 |  | LL | 27,26 | L | 28,80 | L  | 19,89 | L | 26,43 | L |
| 21 |  | LL | 24,30 | L | 26,21 | L  | 17,31 | L | 25,24 | L |
| 23 |  | LL | 23,78 | L | 25,50 | L  | 16,89 | L | 23,97 | L |
| 25 |  | LL | 36,66 | L | NA    | NL | 29,35 | L | 37,86 | L |
| 31 |  | LL | 24,54 | L | 26,96 | L  | 17,76 | L | 26,12 | L |
| 34 |  | LL | 24,68 | L | 27,04 | L  | 18,18 | L | 27,22 | L |
| 36 |  | LL | 30,61 | L | 28,71 | L  | 17,61 | L | 30,33 | L |

Summary of the samples tested for each PCR system from MB patients

| Clinical Form | Total number | sodA(%)<br>positivity | 16S (%)<br>positivity | RLEP (%)<br>positivity | 85B (%)<br>positivity |
|---------------|--------------|-----------------------|-----------------------|------------------------|-----------------------|
| BB            | 5            | 4 (80)                | 5 (100)               | 5 (100)                | 5 (100)               |
| BL            | 5            | 5 (100)               | 5 (100)               | 5 (100)                | 5 (100)               |
| LL            | 11           | 11 (100)              | 11 (100)              | 11 (100)               | 10 (90.9)             |

Paucibacillary patients

| Biopsy Number | Observations | Clinical Form | Ct 16S rRNA | Pred. Class 16S | Ct 85B | Pred. Class 85B | Ct RLEP | Pred. Class RLEP | Ct sodA | Pred. Class sodA |
|---------------|--------------|---------------|-------------|-----------------|--------|-----------------|---------|------------------|---------|------------------|
| 46            | RR           | BT            | NA          | NL              | NA     | NL              | 39,00   | L                | NA      | NL               |
| 87            |              | BT            | 37,98       | L               | 35,46  | L               | 29,91   | L                | 36,71   | L                |
| 88            |              | BT            | 34,84       | L               | 34,26  | L               | 16,91   | L                | 34,31   | L                |

|     |  |    |       |    |       |    |       |    |    |    |
|-----|--|----|-------|----|-------|----|-------|----|----|----|
| 89  |  | BT | NA    | NL | NA    | NL | 31,35 | L  | NA | NL |
| 91  |  | BT | NA    | NL | NA    | NL | 34,74 | NL | NA | NL |
| 92  |  | BT | 39,03 | NL | 38,69 | L  | NA    | NL | NA | NL |
| 94  |  | BT | NA    | NL | NA    | NL | NA    | NL | NA | NL |
| 95  |  | BT | NA    | NL | 39,43 | L  | 33,89 | NL | NA | NL |
| 97  |  | BT | NA    | NL | NA    | NL | 35,68 | L  | NA | NL |
| 98  |  | BT | NA    | NL | NA    | NL | 34,64 | NL | NA | NL |
| 67* |  | BT | NA    | NL | NA    | NL | 35,21 | L  | NA | NL |
| 3   |  | I  | NA    | NL | NA    | NL | 34,25 | NL | NA | NL |
| 8*  |  | I  | NA    | NL | NA    | NL | 35,24 | NL | NA | NL |
| 70  |  | I  | NA    | NL | NA    | NL | 39,51 | L  | NA | NL |
| 71  |  | I  | NA    | NL | 38,92 | L  | 37,49 | L  | NA | NL |
| 72  |  | I  | NA    | NL | NA    | NL | 35,70 | L  | NA | NL |
| 73  |  | I  | NA    | NL | NA    | NL | 37,38 | L  | NA | NL |
| 74  |  | I  | 34,00 | L  | 36,38 | L  | 27,99 | L  | NA | NL |
| 75  |  | I  | NA    | NL | NA    | NL | 37,39 | L  | NA | NL |
| 76  |  | I  | NA    | NL | NA    | NL | 39,51 | L  | NA | NL |

|     |                          |    |       |    |    |    |       |    |    |    |
|-----|--------------------------|----|-------|----|----|----|-------|----|----|----|
| 77  |                          | I  | NA    | NL | NA | NL | 35,95 | L  | NA | NL |
| 78  |                          | I  | NA    | NL | NA | NL | NA    | NL | NA | NL |
| 29* |                          | I  | 38,70 | NL | NA | NL | 38,56 | L  | NA | NL |
| 43  | Biopsy from healthy skin | NP | NA    | NL | NA | NL | 39,52 | NL | NA | NL |
| 93  |                          | TT | NA    | NL | NA | NL | 37,75 | L  | NA | NL |
| 96  |                          | TT | NA    | NL | NA | NL | 35,49 | L  | NA | NL |

Summary of the samples tested for each PCR system from PB patients

| Clinical form | Total number | sodA(%)<br>positivity | 16S (%)<br>positivity | RLEP (%)<br>positivity | 85B (%)<br>positivity |
|---------------|--------------|-----------------------|-----------------------|------------------------|-----------------------|
| BT            | 11           | 2 (18.2)              | 2 (18.2)              | 6 (54.5)               | 4 (36.4)              |
| I             | 12           | 0                     | 1 (8.3)               | 9 (75)                 | 2 (16.7)              |
| NP/TT         | 3            | 0                     | 0                     | 2 (66.7)               | 0                     |

\* These patients were initially classified as controls, but confirmation of leprosy was done only after databank search (5-10 years after biopsy collection). Then, biopsies were reanalyzed histologically and also reclassified as patients according to R&J classification.

#### Non-leprosy patients and normal individuals

| Biopsy Number | Observations                 | Clinical Form | Ct 16S rRNA | Pred. Class 16S | Ct 85B | Pred. Class 85B | Ct RLEP | Pred. Class RLEP | Ct sodA | Pred. Class sodA |
|---------------|------------------------------|---------------|-------------|-----------------|--------|-----------------|---------|------------------|---------|------------------|
| 12            | Capillaritis                 | NL            | 38,43       | NL              | NA     | NL              | 34,14   | L                | 39,04   | NL               |
| 17            | Cutaneous Mucinosis          | NL            | NA          | NL              | NA     | NL              | 34,76   | L                | NA      | NL               |
| 38            | Chronic Dermatitis           | NL            | 38,27       | NL              | NA     | NL              | 32,01   | L                | NA      | NL               |
| 41            | Normal skin (healthy person) | NL            | NA          | NL              | NA     | NL              | NA      | NL               | NA      | NL               |

|    |                                   |    |       |    |    |    |       |    |    |    |
|----|-----------------------------------|----|-------|----|----|----|-------|----|----|----|
| 45 | Normal skin (healthy person)      | NL | NA    | NL | NA | NL | NA    | NL | NA | NL |
| 47 | Normal skin (healthy person)      | NL | NA    | NL | NA | NL | 39,52 | NL | NA | NL |
| 49 | Normal skin (healthy person)      | NL | NA    | NL | NA | NL | NA    | NL | NA | NL |
| 50 | Normal skin (healthy person)      | NL | NA    | NL | NA | NL | 39,85 | NL | NA | NL |
| 61 | Indeterminate Chronic Dermatitis  | NL | NA    | NL | NA | NL | NA    | NL | NA | NL |
| 62 | Erythema Dyschromicum             | NL | NA    | NL | NA | NL | NA    | NL | NA | NL |
| 64 | Indeterminate Chronic Dermatitis  | NL | 38,07 | NL | NA | NL | 37,87 | L  | NA | NL |
| 65 | Reticular Erythematous Mucinosi   | NL | NA    | NL | NA | NL | NA    | NL | NA | NL |
| 66 | Indeterminate Chronic Dermatitis  | NL | NA    | NL | NA | NL | NA    | NL | NA | NL |
| 68 | Non Leprotic Polymorphic Erythema | NL | NA    | NL | NA | NL | NA    | NL | NA | NL |
| 69 | Chronic Eczema                    | NL | NA    | NL | NA | NL | 39,89 | NL | NA | NL |

Summary of the samples tested for each PCR system from non-leprosy patients and normal individuals

| Clinical Form                 | Number | sodA(%) positivity | 16S (%) positivity | RLEP (%) positivity | 85B (%) positivity |
|-------------------------------|--------|--------------------|--------------------|---------------------|--------------------|
| Skin from healthy donor       | 5      | 0                  | 0                  | 0                   | 0                  |
| Other dermatological diseases | 10     | 0                  | 0                  | 4                   | 0                  |









|
